# Supplementary figures and images for: In Vitro Coliform Resistance to Bioactive Compounds in Urinary Infection, Assessed in a Lab Catheterization Model
Source: MDPI journal article supplement (doi:10.3390/app11094315), 2021-05-10

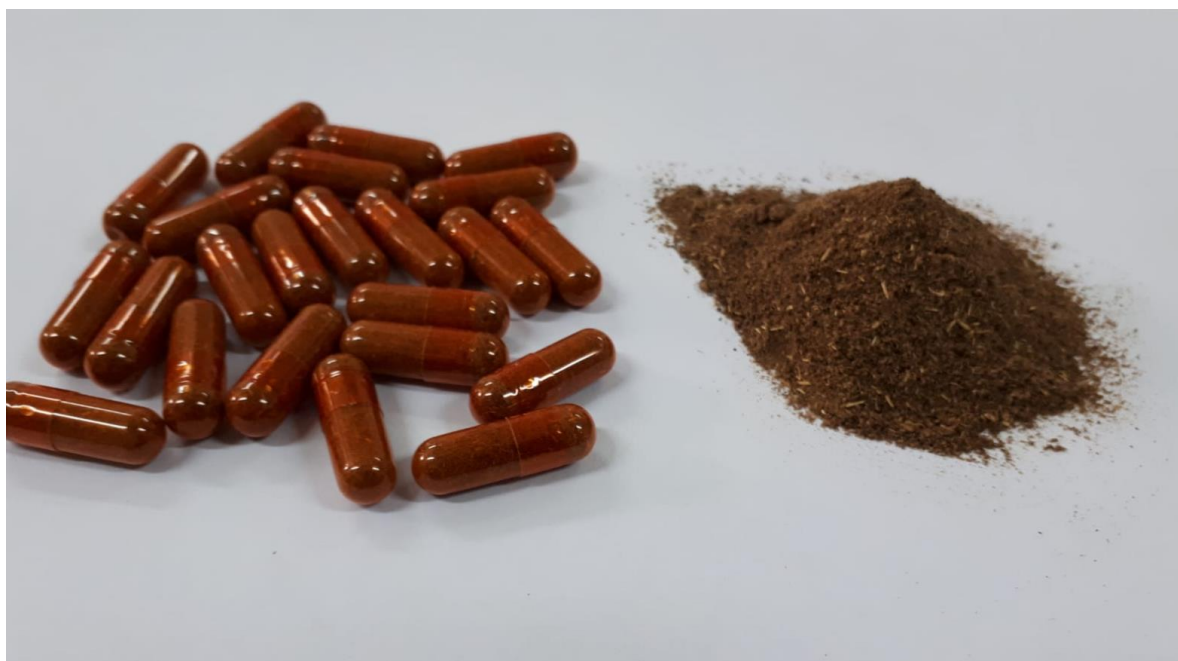

Figure S1.

Supplement: s1 [file s1]
